# Supplementary material for: Tuning the oxidation state of SnOx and mass transport to enhance catholyte-free CO2-to-formate electrolysis
Source: Royal Society of Chemistry journal article supplement (doi:10.1039/d3se00214d), 2023-01-01
Supplement: d3se00214d1.pdf [file d3se00214d1.pdf]

## Supporting Information

# Tuning the Oxidation State of SnO<sub>x</sub> and Mass Transport to Enhance Catholyte-Free CO<sub>2</sub>-to-Formate Electrolysis

*Taewoo Kim,<sup>a</sup> Vivek S. Devalla,<sup>a</sup> Sean P. Dunfield,<sup>b</sup> Jack R. Palmer,<sup>c</sup> Sara Dorr,<sup>a</sup> Moses Kodur,<sup>a</sup> Apoorva Gupta,<sup>b</sup> and David P. Fenning<sup>\*a,b,c</sup>*

<sup>a</sup>Chemical Engineering Program, Department of Nanoengineering, University of California San Diego, La Jolla, California, 92093, United States

<sup>b</sup>Department of Nanoengineering, University of California San Diego, La Jolla, California 92093, United States

<sup>c</sup> Materials Science & Engineering Program, University of California San Diego, La Jolla, California 92093, United States

### Corresponding Author

**David P. Fenning**

Email: [dfenning@eng.ucsd.edu](mailto:dfenning@eng.ucsd.edu)

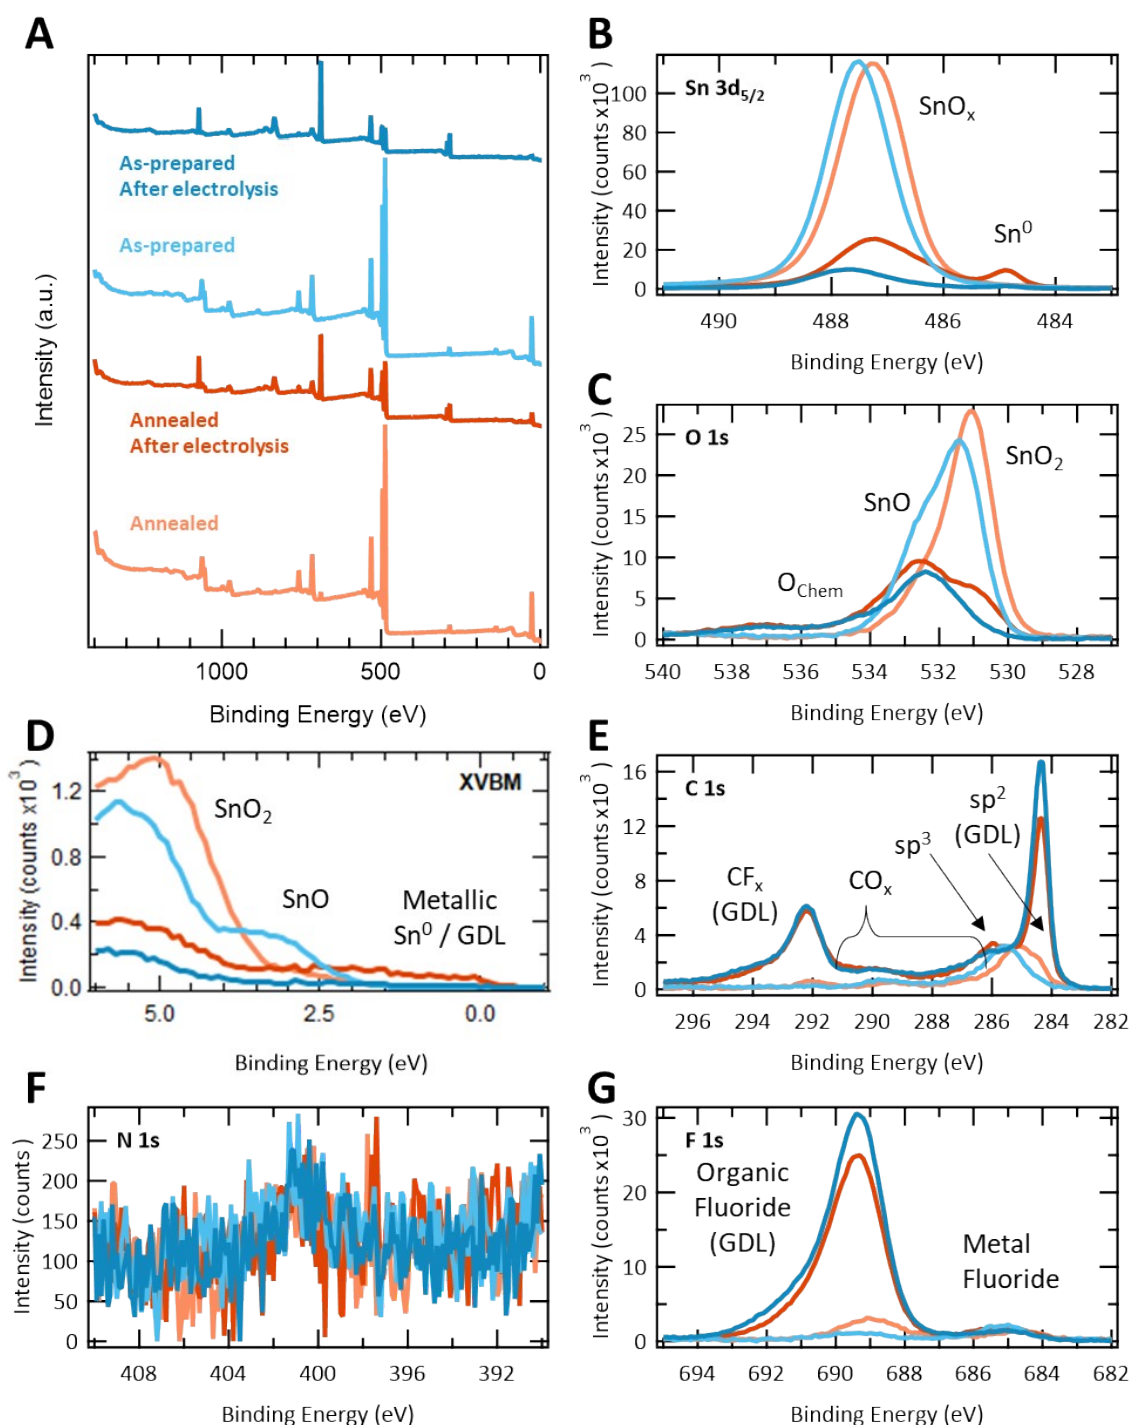

**Figure S1. Electronic structure of the SnO<sub>x</sub> electrodes.** The light blue is as-prepared, the dark blue is as-prepared after 1 hr CO<sub>2</sub> electrolysis, the orange is the annealed, and the red is the annealed after 1 hr CO<sub>2</sub> electrolysis. (A) XPS survey spectra, (B) Sn 3d<sub>5/2</sub>, (C) O 1s, (D) X-ray valence band maximum, (E) C 1s, (F) N 1s, and (G) F 1s XPS spectra of representative SnO<sub>x</sub> films. All core levels have had a scalar background subtracted so that traces can be easily compared.

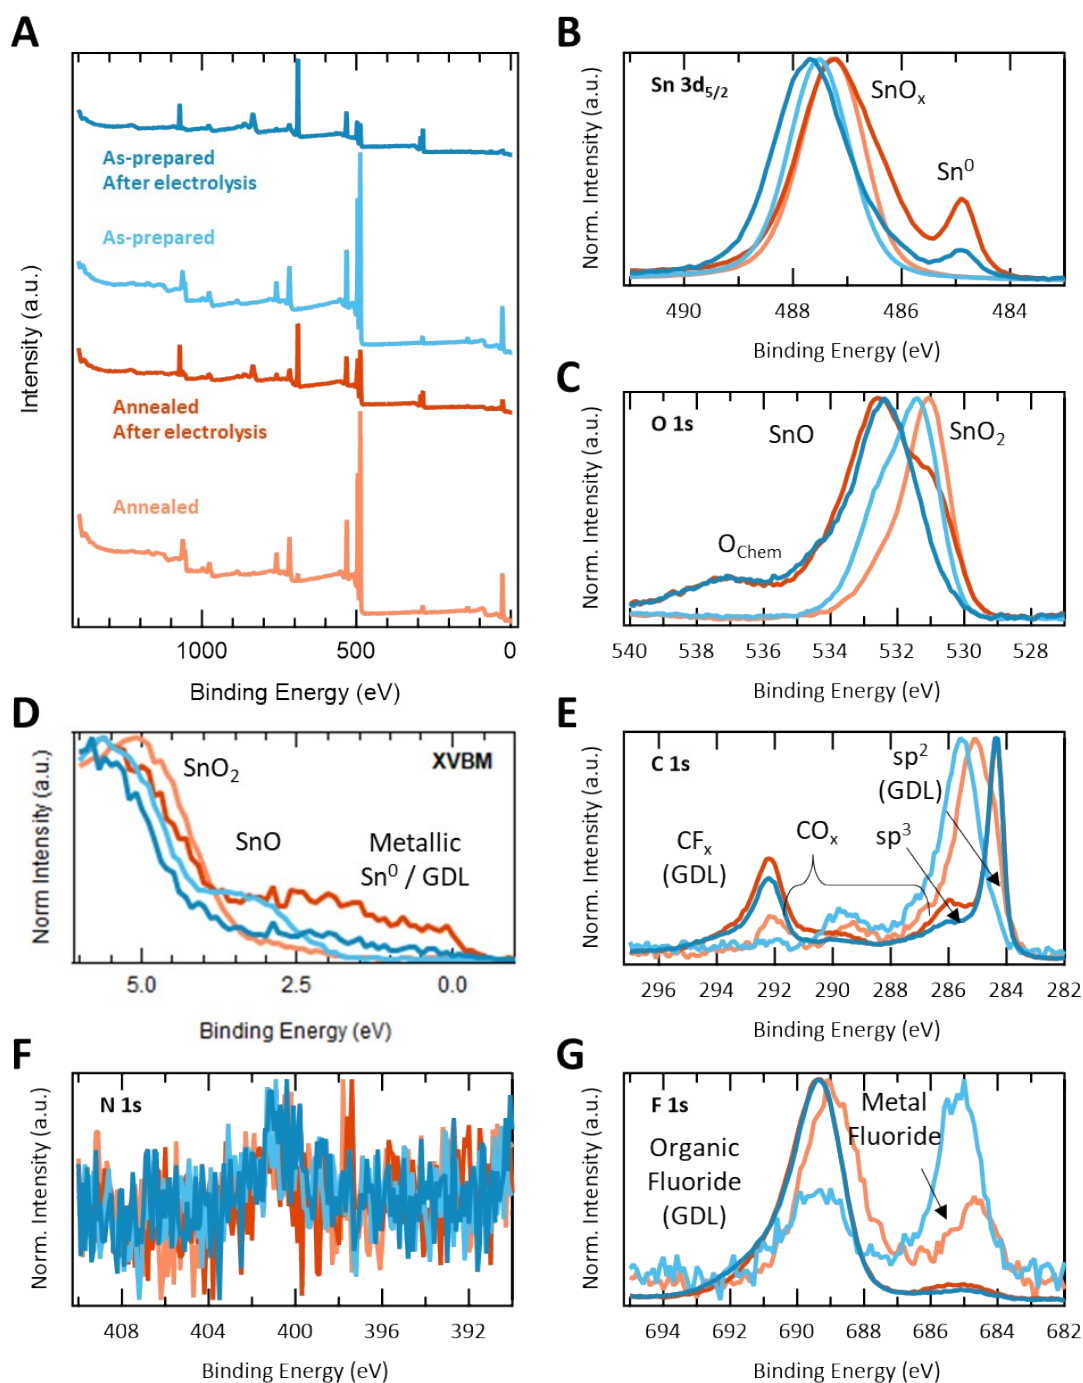

**Figure S2. Electronic structure of the SnO<sub>x</sub> electrodes (normalized).** The light blue is as-prepared, the dark blue is as-prepared after 1 hr CO<sub>2</sub> electrolysis, the orange is the annealed, and the red is the annealed after 1 hr CO<sub>2</sub> electrolysis. (A) XPS survey spectra, (B) Sn 3d<sub>5/2</sub>, (C) O 1s, (D) X-ray valence band maximum, (E) C 1s, (F) N 1s, and (G) F 1s XPS spectra of representative SnO<sub>x</sub> films. All core levels have been normalized by baseline subtraction at the minimum value and scalar multiplication at the maximum so that the distribution of states within a given core level can be easily compared.

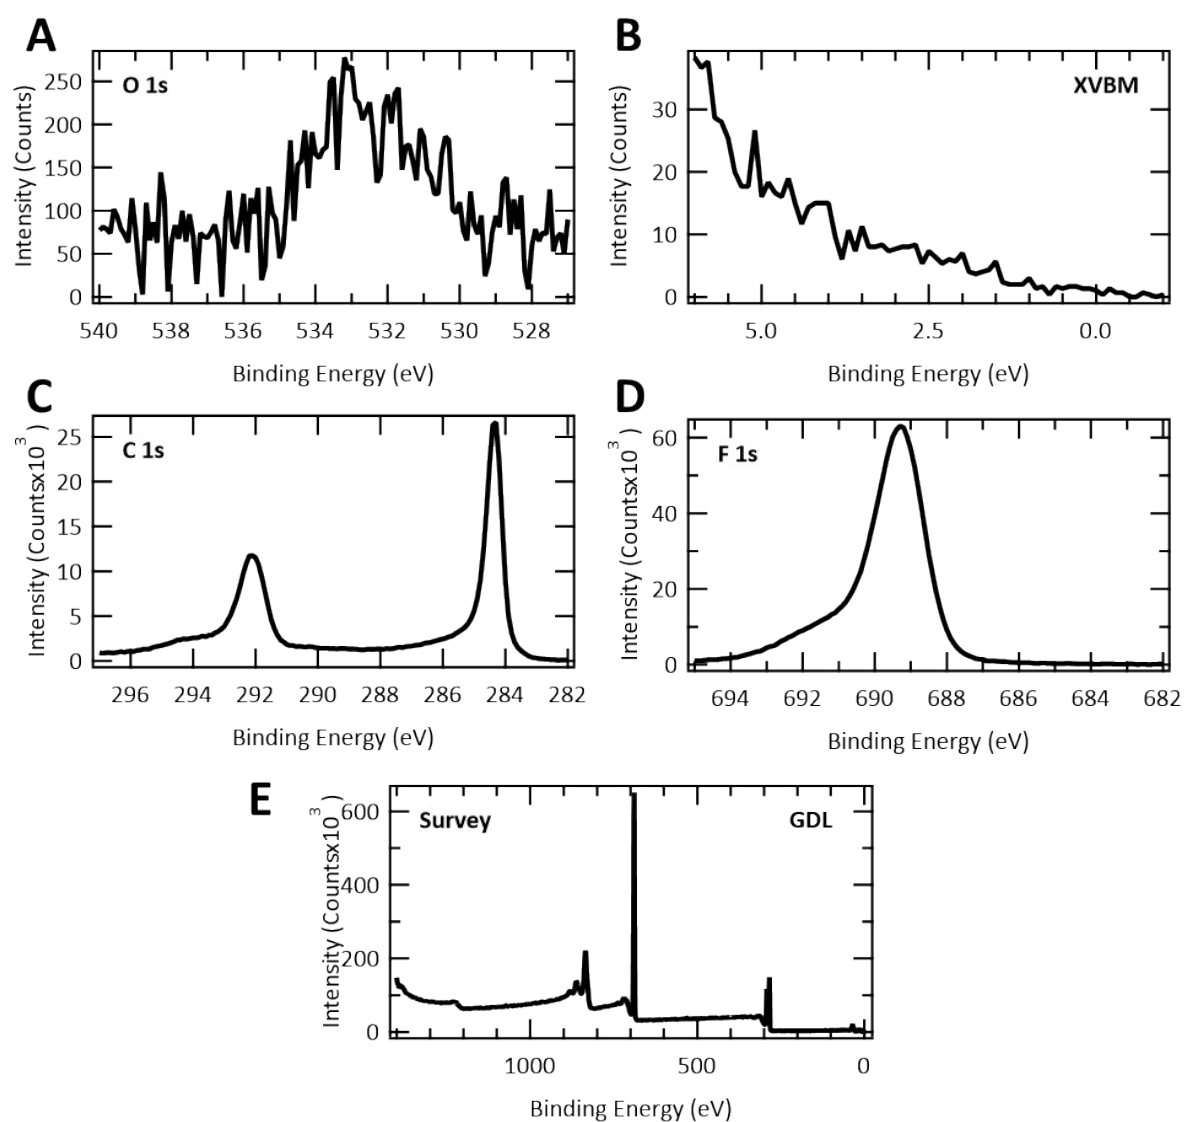

**Figure S3. Electronic structure of the bare GDL.** (A) O 1s, (B) X-ray valence band maximum, (C) C 1s, (D) F 1s, and (E) XPS survey spectra of bare GDL. All core levels have had a scalar background subtracted so that traces can be easily compared.

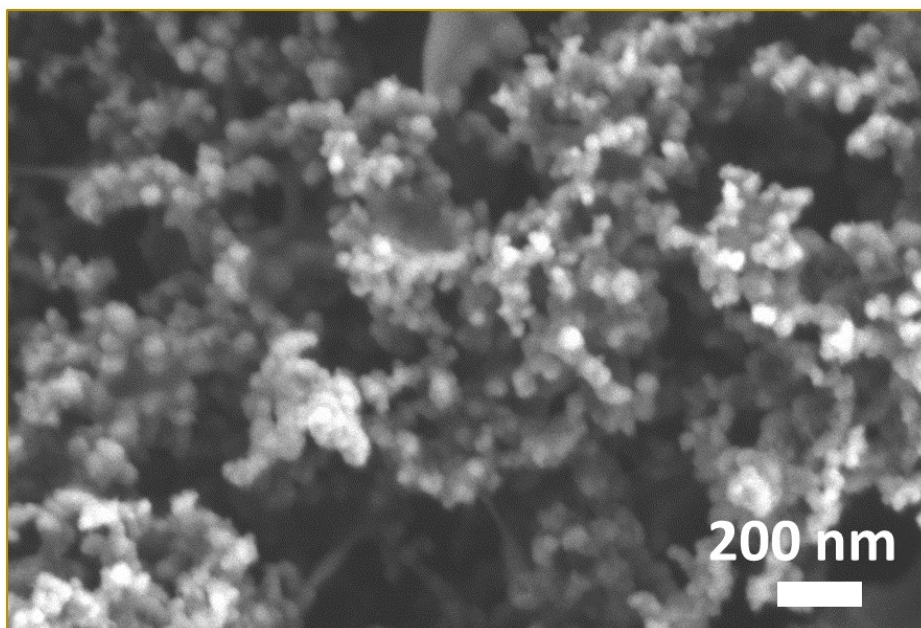

**Figure S4. Scanning electron microscopy (SEM) image of bare gas diffusion layer (AvCarb GDS2230).**

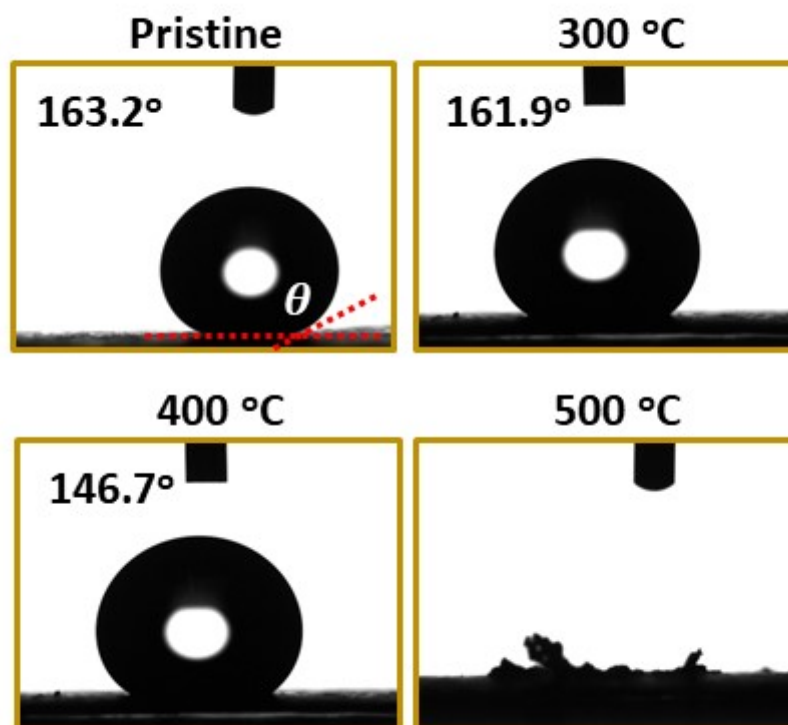

**Figure S5. The contact angle of H<sub>2</sub>O on the gas diffusion layers along with increasing annealing temperature.** The contact angle on the GDLs annealed above 300 °C decreases or the surface is deformed during the measurement, indicating degradation of the structural property.

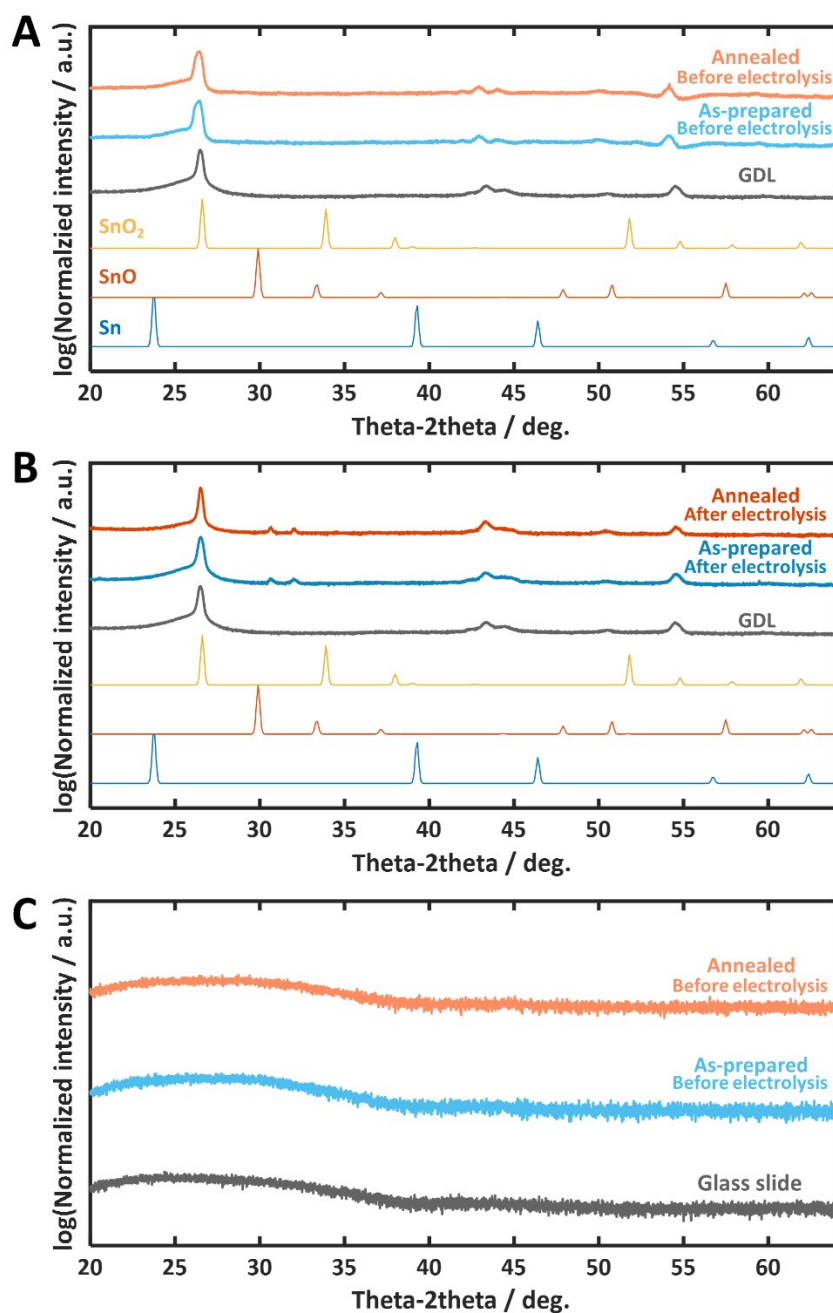

**Figure S6. The crystalline structure of the  $\text{SnO}_x$  electrodes (A) before and (B) after electrolysis on gas diffusion layer and (C) the  $\text{SnO}_x$  electrodes on glass slides.**

Diffractometry of bare gas diffusion layer and glass slide are included for comparison. Bragg diffraction angles are confirmed by using Sn (ICSD PDF No. 40-039),  $\text{SnO}$  (ICSD PDF No. 15-516), and  $\text{SnO}_2$  (ICSD PDF No. 9-163) references. The diffraction at 30 and 31 deg. on both  $\text{SnO}_x$  catalysts after electrolysis in Figure S6B is appeared to be a minor bicarbonate crystal remaining on the surface of the  $\text{SnO}_x$  electrodes. The characteristic hump at lower deg. (< 40 deg.) on both  $\text{SnO}_x$  electrodes in Figure S6C indicates an amorphous nature of the  $\text{SnO}_x$  electrodes.

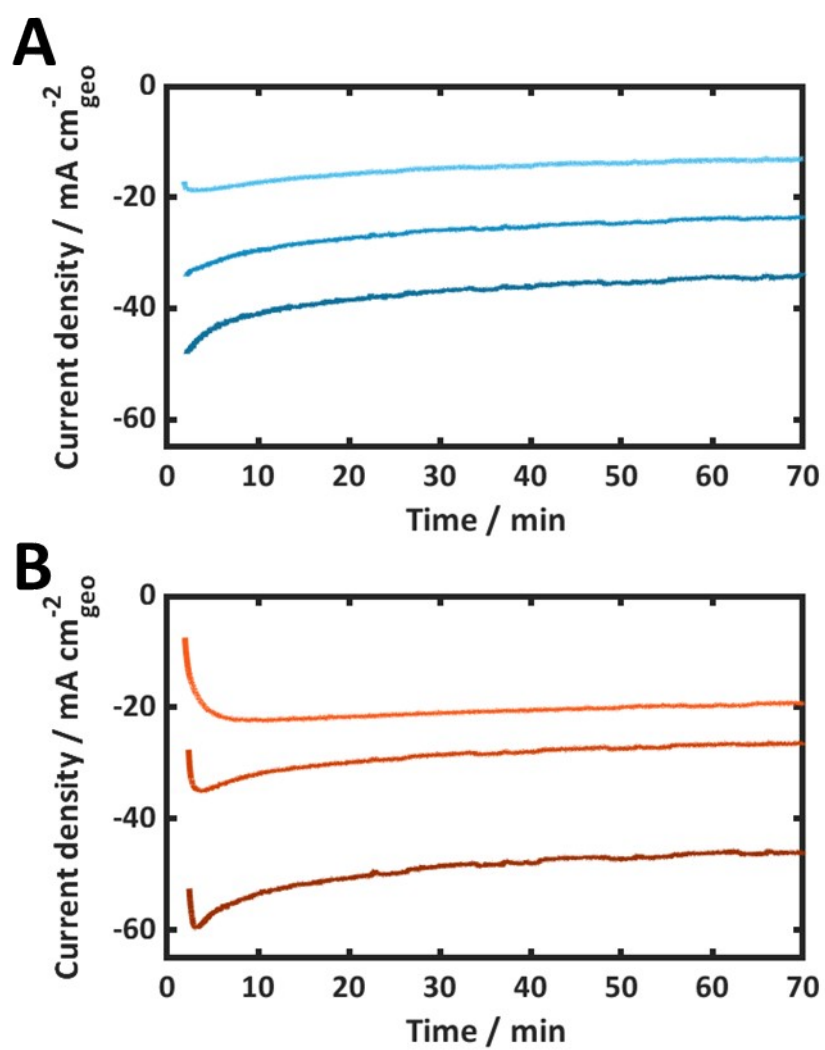

**Figure S7. Current density profile with respect to electrolysis time.** Catalyst with (A) an SnO-rich surface preparation and (B) an SnO<sub>2</sub>-rich surface preparation. The cell voltages are 3.4, 3.2, and 3.0 V (from bottom to top per figure).

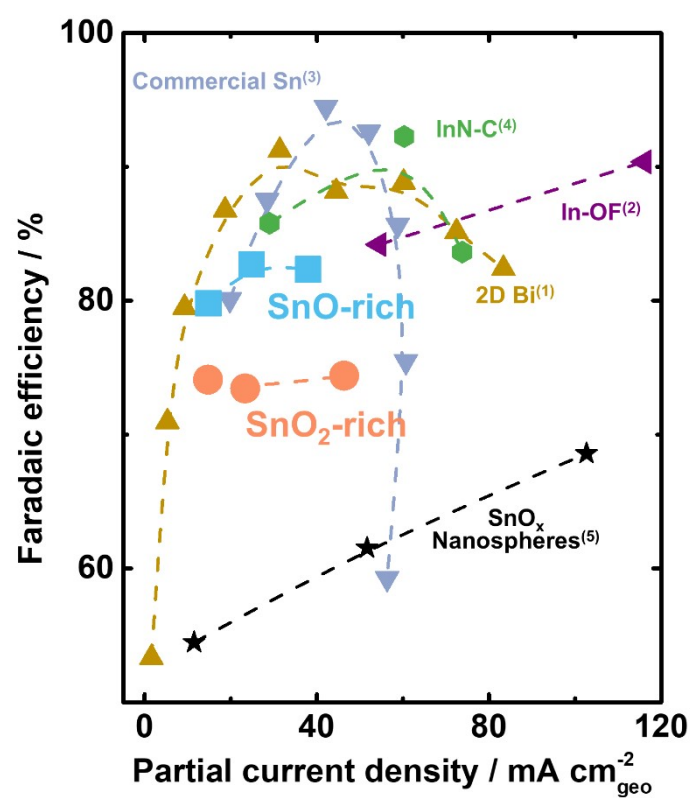

Figure S8. Comparison of Faradaic efficiency and geometric partial current density of formate on the  $\text{SnO}_x$  catalyst with the state-of-the-art catalysts ( $2\text{D Bi}^1$ ,  $\text{In-OF}^2$ , commercial  $\text{Sn}^3$ ,  $\text{InN-C}^4$ , and  $\text{SnO}_x$  nanospheres<sup>5</sup>).

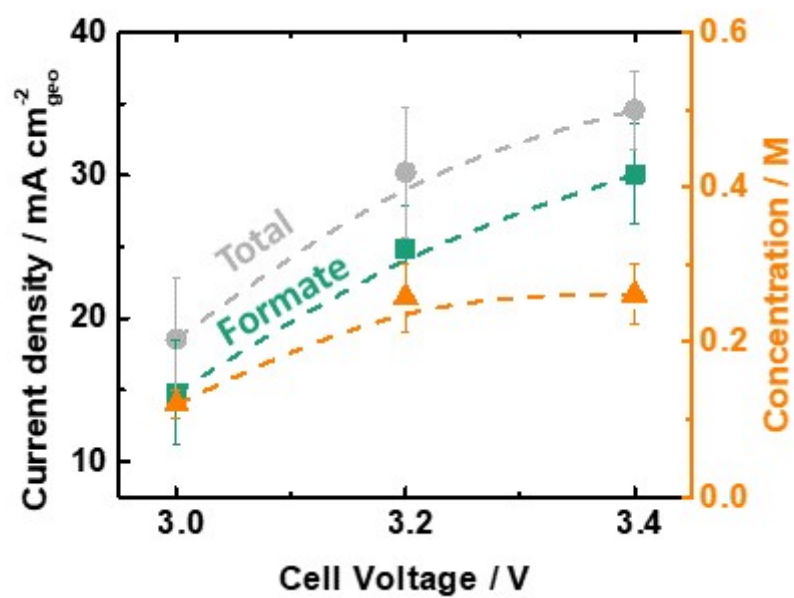

Figure S9. The current densities and concentration of formate as a function of cell voltage.

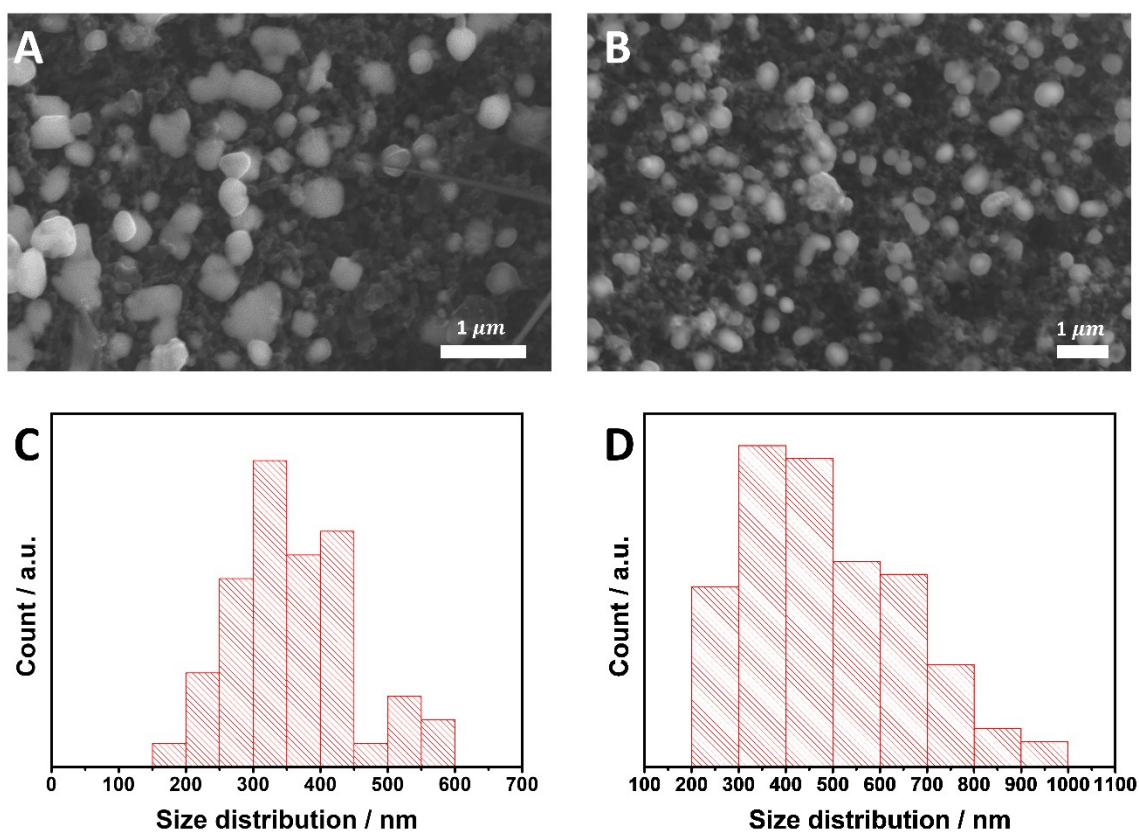

**Figure S10. SEM images and size distribution of the catalyst prepared with an SnO-rich surface after extended period of electrolysis.** (a) after 200 and (b) 300 min. Particle size distribution of (c) after 200 and (d) 300 min. The averaged particle sizes are  $360 \pm 89$  and  $488 \pm 166$  nm, respectively.

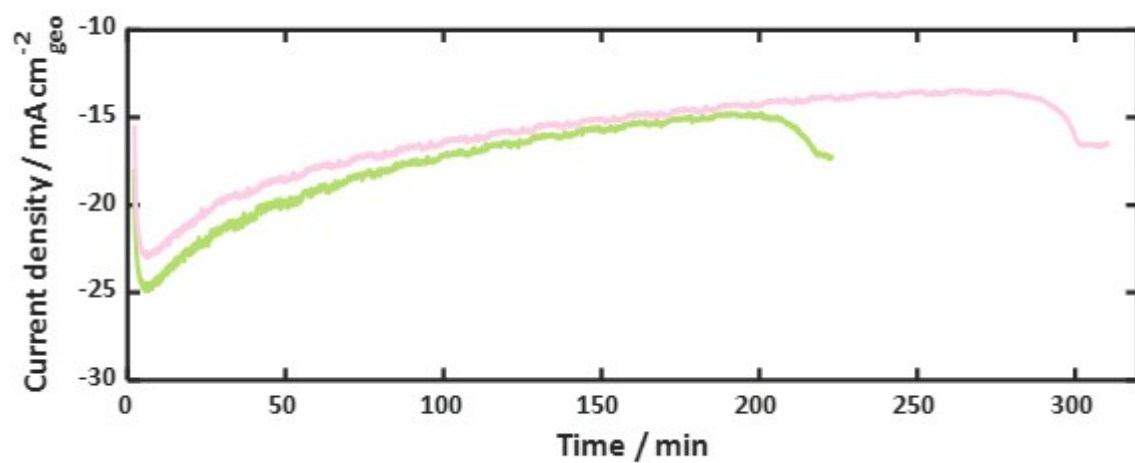

Figure S11. Current density profile of the extended period of electrolysis on the catalyst prepared with an SnO-rich surface at 3.0 V of cell voltage.

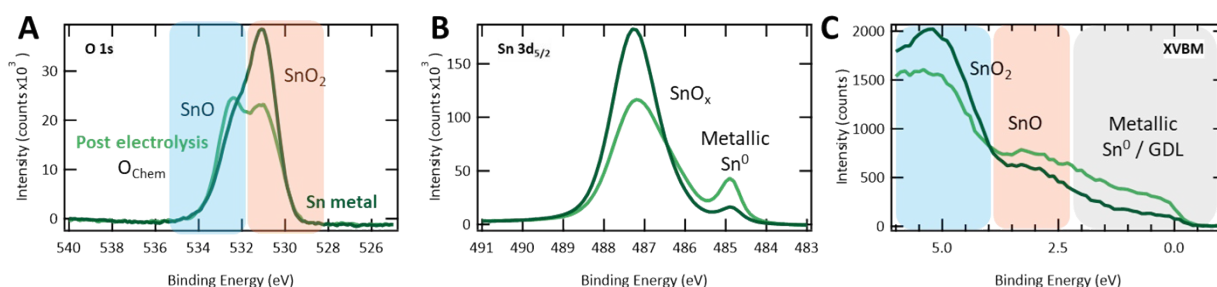

**Figure S12. XPS of core level of (A) O 1s and (B) Sn 3d<sub>5/2</sub>, and (C) X-ray valence band maximum (XVBM) spectra.** An hour of CO<sub>2</sub> electrolysis is performed in 3 electrode system in a batch reactor, which consists of untreated Sn foil (working electrode), graphite rod (counter electrode), and Ag/AgCl/KCl(gel) (reference electrode) in CO<sub>2</sub>-saturated 0.1 M KHCO<sub>3</sub> at 5 sccm of CO<sub>2</sub> flow rate.

We experimentally confirmed that SnO<sub>x</sub> does not fully reduce to Sn<sup>0</sup> during CO<sub>2</sub> electrolysis with a control experiment using a Sn metal foil with a native oxide (Figure S12). We performed CO<sub>2</sub> electrolysis on the untreated Sn metal foil (99.998% purity, Alfa Aesar) in a batch reactor to examine if a complete reduction of the native SnO<sub>x</sub> was observed under CO<sub>2</sub> reduction environment. Before electrolysis, we confirmed that the surface of the untreated Sn metal foil consists of a native oxide with mixed SnO, SnO<sub>2</sub>, and metallic Sn<sup>0</sup> features via O 1s and Sn 3d<sub>5/2</sub> core levels along with the XVBM spectra (dark green curves in Figure S12). After electrolysis, we found that the surface still mainly consists of SnO<sub>x</sub> although some reduction of SnO<sub>x</sub> is observed as evidence by: 1) an increase in the feature located within the higher binding energy region of the O 1s spectrum where SnO is expected (~533 eV), 2) an additional feature between the SnO<sub>x</sub> and metallic Sn<sup>0</sup> in Sn 3d<sub>5/2</sub> (~486 eV) that is consistent with reduced SnO<sub>x</sub> (e.g., SnO) and an increase in intensity of the Sn<sup>0</sup> feature, and 3) a decreased ratio of SnO<sub>2</sub> (~530 eV) to SnO (~534 eV) and SnO<sub>x</sub> (~487 eV) to metallic Sn<sup>0</sup> (~485 eV) as compared to before electrolysis. Thus, the post-electrolysis XPS is sensitive to the characteristic electronic and chemical structure of both the SnO- and SnO<sub>2</sub>-rich catalysts post-electrolysis rather than a regrown oxide and that the surface chemistry can therefore be interpreted with respect to the catalytic performance.

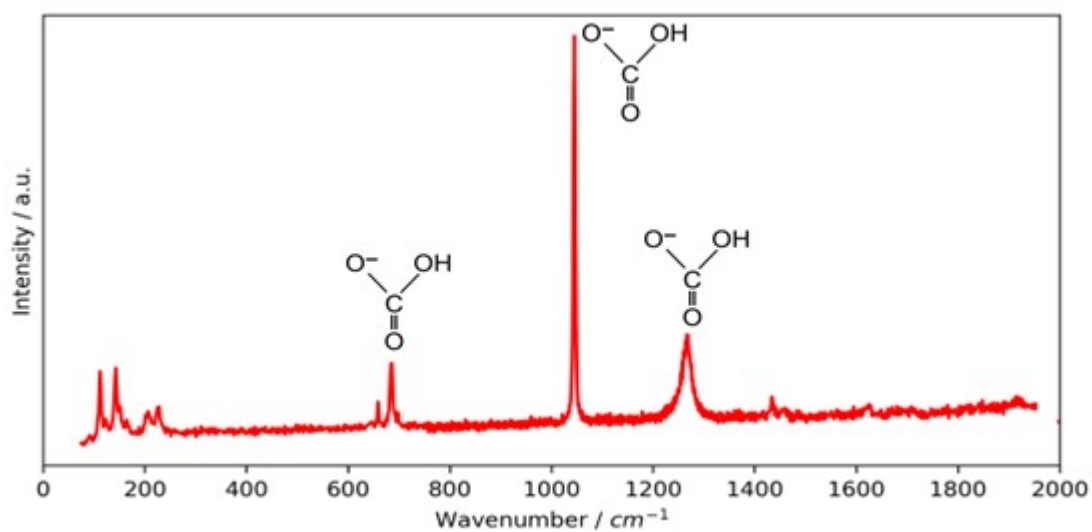

**Figure S13. Post-electrolysis Raman Spectra.** Raman spectra on the surface of a representative  $\text{SnO}_x$  catalyst after 1 hr of  $\text{CO}_2$  electrolysis.

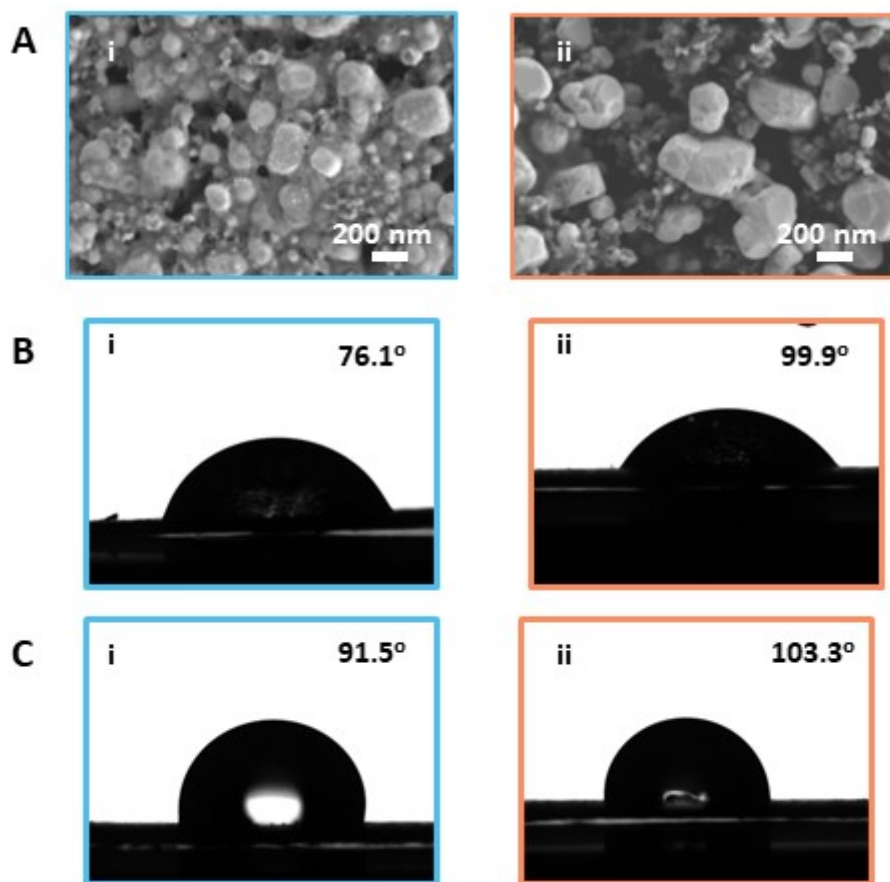

**Figure S14. Post-electrolysis characterizations at 3.0 V of cell voltage for 1 hr.** SEM images after electrolysis of catalysts prepared with A(i) SnO-rich surface A(ii) SnO<sub>2</sub>-rich surface. The contact angle of H<sub>2</sub>O on catalysts prepared with an SnO-rich surface B(i) before and C(i) after electrolysis and a SnO<sub>2</sub>-rich surface B(ii) before and C(ii) after electrolysis.

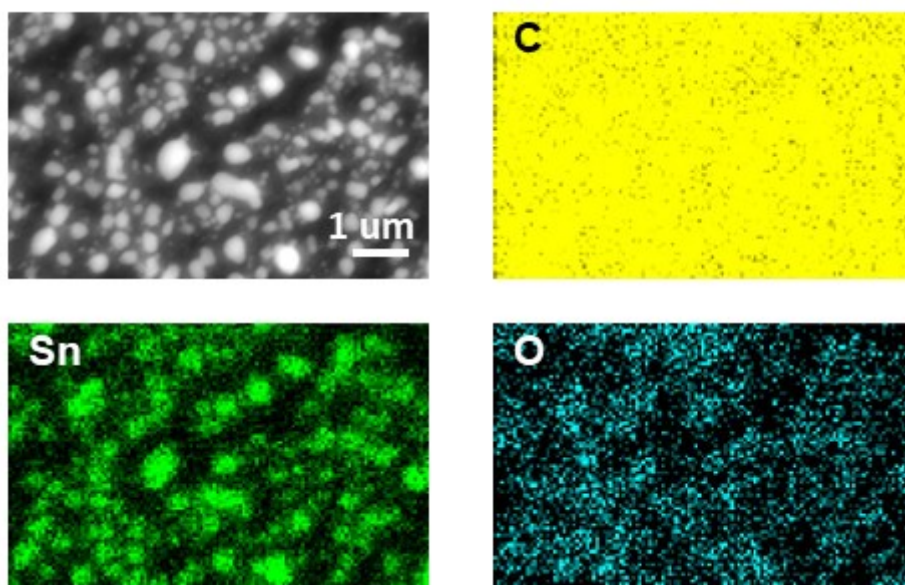

**Figure S15.** Post-electrolysis SEM-EDS on the catalyst prepared with an SnO-rich surface after electrolysis at 3.0 V of cell voltage for 1 hr.

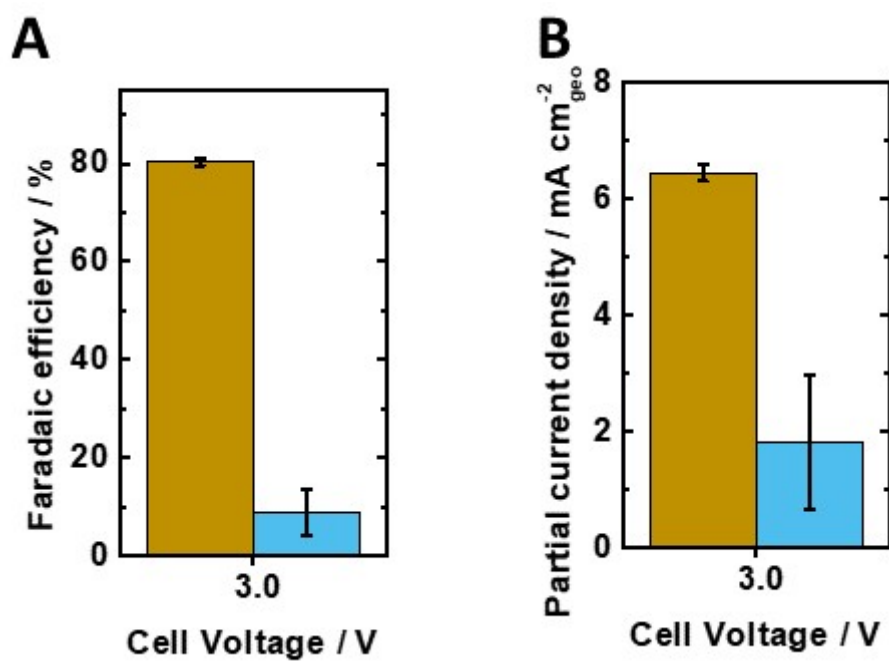

**Figure S16. Comparison of hydrogen evolution on bare GDL (brown) and the catalysts prepared with an SnO-rich surface (light blue). No CO<sub>2</sub> reduction products are detected on the bare GDL. (A) Faradaic efficiency and (B) geometric partial current density of hydrogen.**

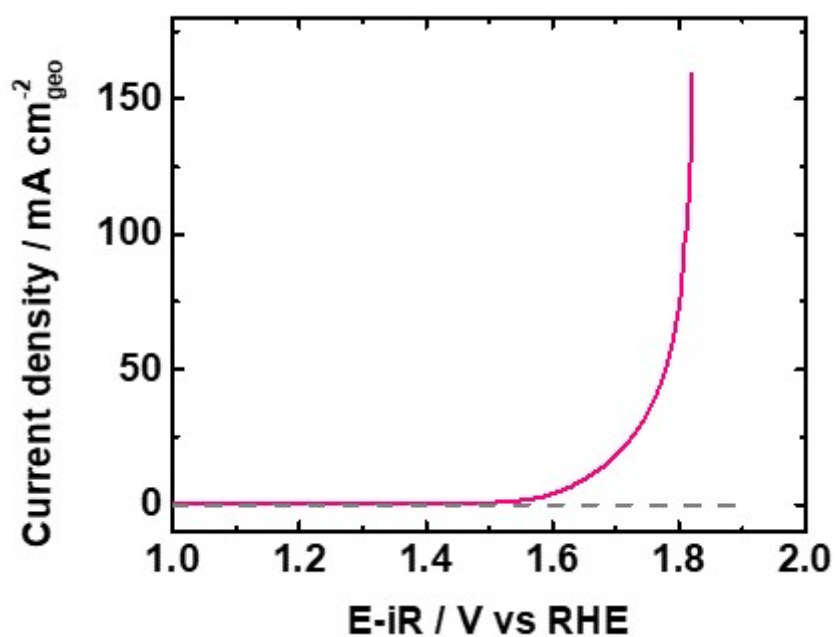

**Figure S17. Anodic linear sweep voltammetry scans at 20 mV/s in 0.5 M sodium phosphate buffer solution (pH 3).** The solid pink line is for IrO<sub>x</sub> on Ti mesh electrode and the dashed gray line is for bare Ti mesh electrode. The estimated onset potential of oxygen evolution reaction on the IrO<sub>x</sub> on Ti mesh electrode is 1.78 V vs RHE. Considering the thermodynamic overpotentials of CO<sub>2</sub>-to-formate and oxygen evolution reaction (-0.12 and 1.23 V vs RHE, respectively), the estimated overpotential on the cathode at 3.0 V of cell voltage is 1.1 V.

## Reference

- 1 C. Xia, P. Zhu, Q. Jiang, Y. Pan, W. Liang, E. Stavitski, H. N. Alshareef and H. Wang, *Nat. Energy*, 2019, **4**, 776–785.
- 2 Z. Wang, Y. Zhou, C. Xia, W. Guo, B. You and B. Y. Xia, *Angew. Chemie Int. Ed.*, 2021, **60**, 19107–19112.
- 3 W. Lee, Y. E. Kim, M. H. Youn, S. K. Jeong and K. T. Park, *Angew. Chemie*, 2018, **130**, 6999–7003.
- 4 P. Hou, X. Wang and P. Kang, *J. CO2 Util.*, 2021, **45**, 101449.
- 5 T. D. Nguyen-Phan, L. Hu, B. H. Howard, W. Xu, E. Stavitski, D. Leshchev, A. Rothenberger, K. C. Neyerlin and D. R. Kauffman, *Sci. Rep.*, 2022, **12**, 1–10.
